# Supplementary material
Source: publisher figshare collection journal article supplement (https://gsapubs.figshare.com/ndownloader/files/38176029)
Supplement: Supplementary file 1 [file 38176029]

## Sheet: Sheet1
Input Thermochronological Data
Model Run Name	Only AHe Data							Only Zhe Data	Only AFT Data
Sample Name	15MTP-01	84MP05	84MP03	15MTP-02	15MTP-03	15MTP-04	15MTP-05	15MTP-01	84MP02	84MP04	84MP05	84MP03
Individual/multi-sample/profile model	Profile							Individual	Profile
(e.g.) AFT Data	No	No	No	No	No	No	No	No	Yes	Yes	Yes	Yes
# Single Grains	-	-	-	-	-	-	-	-	20	20	20	20
# HCT Lengths	-	-	-	-	-	-	-	-	No	No	No	No
Dpar	-	-	-	-	-	-	-	-	Yes	Yes	Yes	Yes
(e.g.) Apatite (U-Th)/He (#)	Yes	Yes	Yes	Yes	Yes	Yes	Yes	No	No	No	No	No
# Single Grains	4	4	5	5	5	4	7	-	-	-	-	-
(e.g.) Zircon (U-Th)/He (#)	No	No	No	No	No	No	No	Yes	No	No	No	No
# Single Grains	-	-	-	-	-	-	-	3	-	-	-	-
General ranges for prior, additional constraints, temperature offset
General prior range
Time (Ma)	33±33							33±33	33±33
Temperature (°C)	70±70							70±70	70±70
Comment	Default rages applied by QTQt version 5.6.2							Default rages applied by QTQt version 5.6.2	Default rages applied by QTQt version 5.6.2
Constraint #1
Time (Ma)	--	--	--	--	--	--	--	--	--	--	--	--
Temperature (°C)	--	--	--	--	--	--	--	--	--	--	--	--
Comment	--	--	--	--	--	--	--	--	--	--	--	--
Temperature offset of profile samples
Palaeo-temperature offset (°C)/Geothermal gradient (°C/km)	30±1°C/km							30±1°C/km	30±1°C/km
Present-day temperature offset (°C)/Geothermal gradient (°C/km)	7±3°C/km							7±3°C/km	7±3°C/km
Offset allowed to vary over time?	No							No	No
System-and model-specific parameters
Modelling software (and version)	QTQt (Version 5.7.1) (Gallagher, 2012)							QTQt (Version 5.7.1) (Gallagher, 2012)	QTQt (Version 5.7.1) (Gallagher, 2012)
FT annealing model
FT annealing model	-							-	Ketcham et al. (2007)
C-axis projection	-							-	No
Compositional parameter	-							-	Dpar
Etchant	-							-	No
Apatite He Kinetic Model
Radiation Damage	Flowers et al. (2009)							-	-
comments on RD model used	model used in original study							-	-
Additional parameters	-							-	-
Alpha-ejection	input ages uncorrected							-	-
Resampling of data?	Resampling of observed ages*							-	-
Zircon He Kinetic Model
Radiation Damage	-							Guenthner et al. (2013)	-
comments on RD model used	-							model used in original study	-
Additional parameters	-							-	-
Alpha-ejection								input ages uncorrected
Resampling of data?	-							Resampling of observed ages*	-
# Iterations
Burn in	50000							50000	50000
Post-Burn in	200000							200000	200000
Comments
MCMC parameters
Acceptance Rates
time & temperature	0.0832 & 0.3853							0.1049 & 0.7962	0.20930 & 0.52072
birth & death	0.0140 & 0.0141							0.0117 & 0.0919	0.02537 & 0.03407
Comments	time acceptance rate is low, birth and death rates similar							time acceptance rate is low, birth and death	acceptance rates within 0.2-0.6 range, birth &
	convergence of likelihood chains,							rates similar, convergence of likelihood chains,	death rates less similar, convergence of chains,
Data fit assessment	visual plot inspection of obs. vs. pred. ages							visual plot inspection of obs. vs. pred. ages	visual plot inspection of obs. vs. pred. ages
Model used for interpretation	Expected							Expected	Expected
Comments	most commonly recommended (Gallagher, 2012)							recommended (Gallagher, 2012)	recommended (Gallagher, 2012)
*Footnote 1	Choice for original study							Choice for original study	Choice for original study
